# Supplementary material for: CeO2-modified monolithic ceramic foams for efficient catalytic ozonation of refractory organic pollutants in a continuous-flow reactor
Source: Royal Society of Chemistry journal article supplement (doi:10.1039/d4cy00710g), 2024-01-01
Supplement: d4cy00710g1.pdf [file d4cy00710g1.pdf]

1 **Supporting Information**

2

3 **CeO<sub>2</sub> modified monolithic ceramic foams for efficient catalytic ozonation of**  
4 **refractory organic pollutants in a continuous-flow reactor**

5 Yang Zhao <sup>a</sup>, Wenfei Ding <sup>a</sup>, Xiaochi Chen <sup>b,\*</sup>, Shuo Chen <sup>a,\*</sup>

6

7 <sup>a</sup> *Key Laboratory of Industrial Ecology and Environmental Engineering (Ministry of Education,*  
8 *China), School of Environmental Science and Technology, Dalian University of Technology,*  
9 *Dalian 116024, China*

10 <sup>b</sup> *Department of Urology, The First Affiliated Hospital of Dalian Medical University, Dalian*  
11 *116011, China*

12 \*Corresponding author.

13 Xiaochi Chen: Tel: +86-18098876027, chenxiaochi1216@163.com

14 Shuo Chen: Tel: +86-411-84706263, shuochen@dlut.edu.cn

15

16

17

18 The preparation parameters including the loading of  $\gamma$ -Al<sub>2</sub>O<sub>3</sub> coating, calcination  
19 temperature, calcination time, and loading of CeO<sub>2</sub> were optimized.

#### 20 ***Loading of $\gamma$ -Al<sub>2</sub>O<sub>3</sub> coating on CF***

21 CF is a good monolithic support, but has different physical properties with active catalytic  
22 components. In order to strengthen the adhesion of active components and increase the surface  
23 area,  $\gamma$ -Al<sub>2</sub>O<sub>3</sub> was selected as coating material before loading of CeO<sub>2</sub> because of its close  
24 property with  $\alpha$ -Al<sub>2</sub>O<sub>3</sub> CF and high porosity. The effect of  $\gamma$ -Al<sub>2</sub>O<sub>3</sub> loading on the catalytic  
25 performance was investigated by repeated coating and calcination process of aluminum sol  
26 while the mass of CeO<sub>2</sub> was kept constant at 3.6wt%. Four catalysts with different  $\gamma$ -Al<sub>2</sub>O<sub>3</sub>  
27 coating loads were noted as CeO<sub>2</sub>/6%AlCF, CeO<sub>2</sub>/13%AlCF, CeO<sub>2</sub>/20%AlCF, and  
28 CeO<sub>2</sub>/26%AlCF, respectively, while the percentage means the mass percentage of  $\gamma$ -Al<sub>2</sub>O<sub>3</sub> on  
29 the CF support.

30 As shown in Fig. S1, the removal of TOC increased from 88.9% to 96.2% when the  
31 content of  $\gamma$ -Al<sub>2</sub>O<sub>3</sub> increased from 13% to 20%. It was found from the BET analysis that  $\gamma$ -  
32 Al<sub>2</sub>O<sub>3</sub> sol coating on CF support could form a porous structure after calcination, and the  
33 specific surface area increased from 0.684 m<sup>2</sup> g<sup>-1</sup> to 97.2 m<sup>2</sup> g<sup>-1</sup> with a transformation from a  
34 microporous surface to a mesoporous surface. The large specific surface area facilitates the  
35 loading and dispersion of Ce, providing more active sites for the catalytic ozonation. But when  
36 the mass of  $\gamma$ -Al<sub>2</sub>O<sub>3</sub> increased further, TOC declined slightly to 93.3%. It was found that the  
37 excessive  $\gamma$ -Al<sub>2</sub>O<sub>3</sub> tend to loss during the reaction, and the mass loss of the  $\gamma$ -Al<sub>2</sub>O<sub>3</sub> and CeO<sub>2</sub>  
38 on the surface of the four monolithic catalysts were 0.5%, 0.9%, 1.3% and 2.4%, respectively,  
39 after 20 min of ultrasonication.

#### 40 ***Calcination Temperature***

41 When the calcination temperature is too low, the metal salt can not be completely  
42 transformed into oxides. But if the calcination temperature is too high, the catalyst will sinter  
43 and the active sites and accessible adsorption sites will be reduced. The calcination temperature

44 was optimized ranged from 350 °C to 500 °C. The best catalytic performance was observed at a  
45 calcination temperature of 400 °C with TOC removal of 95.1% in 100 min, while the TOC  
46 removal was only 81.2% with a calcination temperature of 350 °C.

#### 47 *Calcination Time*

48 Fig. S4 showed the effect of calcination time on the TOC removal. When the calcination  
49 time was set as 2 h, the removal rate of TOC was only 80.5%, which may be due to the  
50 incomplete decomposition of metal nitrate on the surface and the insufficient active sites due to  
51 the short calcination time. When the calcination time was increased to 3 h and 4 h, the removal  
52 of TOC increased to 83.9% and 95.1%, showing a high catalytic activity. However, when the  
53 calcination time was extended to 5 h, the TOC removal decreased slightly. Therefore, 4 h was  
54 selected as the calcination time for the catalyst preparation.

#### 55 *Loading of CeO<sub>2</sub>*

56 Under the preparation conditions of calcination temperature of 400 °C and calcination  
57 time of 4 h, the effect of concentrations of Ce(NO<sub>3</sub>)<sub>3</sub> impregnating solution on the mineralized  
58 phenol effect of CeO<sub>2</sub>/AlCF was investigated. As shown in Figure 3.5, when the impregnating  
59 solution concentration was increased from 0.1 mol L<sup>-1</sup> to 0.3 mol L<sup>-1</sup>, the TOC removal rate of  
60 the catalyst increased from 77.6% to 96.3%, and the degradation efficiency was significantly  
61 improved. However, too high ion concentration will cause excessive adsorption of cerium  
62 nitrate on the support surface, occupying a large number of effective active sites, thereby  
63 reducing the specific surface area, the catalytic activity decreased to 93.2%, and the excessive  
64 cerium nitrate caused sintering after high-temperature calcination reduced the porosity and  
65 even blocked the pores, affecting the mass transfer effect. Considering the economy,  
66 environmental protection and catalytic activity, the concentration of impregnation solution is  
67 selected as 0.3 mol L<sup>-1</sup>.

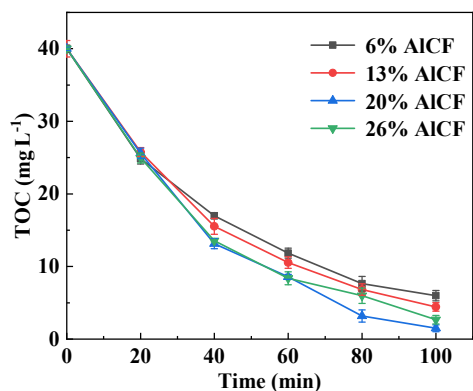

68

69 **Fig. S1** Effect of  $\gamma$ -Al<sub>2</sub>O<sub>3</sub> loading on TOC removal of phenol (Conditions: calcination  
 70 temperature 400 °C, calcination time 4 h, concentration of Ce(NO<sub>3</sub>)<sub>3</sub> impregnating solution 0.3  
 71 mol L<sup>-1</sup>, [O<sub>3</sub>] = 10.1 mg L<sup>-1</sup>, pH = 7.2)

72

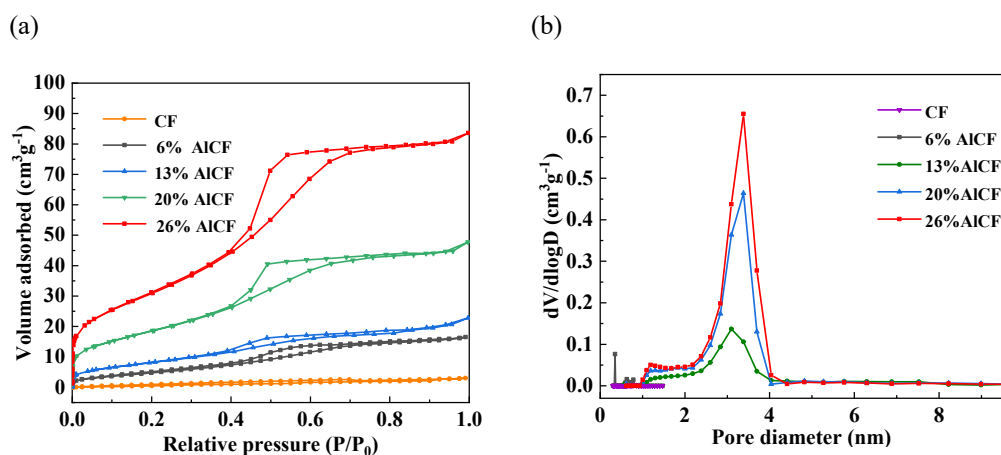

73 **Fig. S2** (a) N<sub>2</sub> adsorption-desorption isotherms and (b) pore size distribution of different AlCF

74

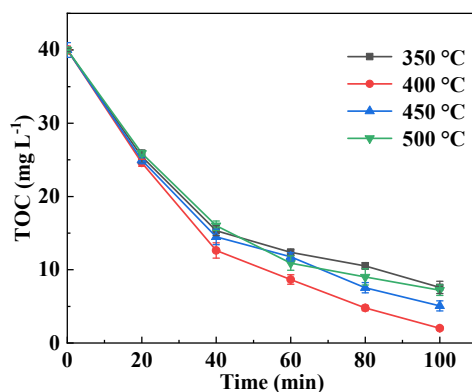

75

76 **Fig. S3** Effect of calcination temperature on TOC removal of phenol (Conditions: calcination  
 77 time 4 h, concentration of  $\text{Ce}(\text{NO}_3)_3$  impregnating solution  $0.3 \text{ mol L}^{-1}$ ,  $[\text{O}_3] = 10.1 \text{ mg L}^{-1}$ , pH  
 78  $=7.2$ )

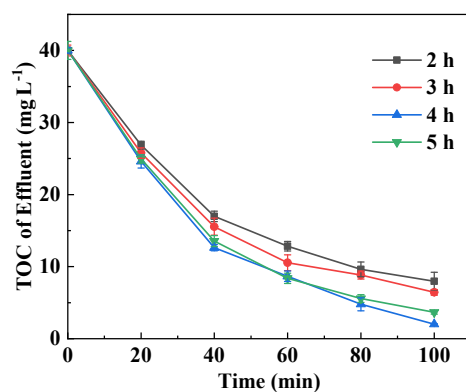

79

80 **Fig. S4** Effect of calcination time on TOC removal of phenol (Conditions: calcination  
 81 temperature  $400 \text{ }^\circ\text{C}$ , concentration of  $\text{Ce}(\text{NO}_3)_3$  impregnating solution  $0.3 \text{ mol L}^{-1}$ ,  $[\text{O}_3] = 10.1$   
 82  $\text{mg L}^{-1}$ , pH =  $7.2$ )

83

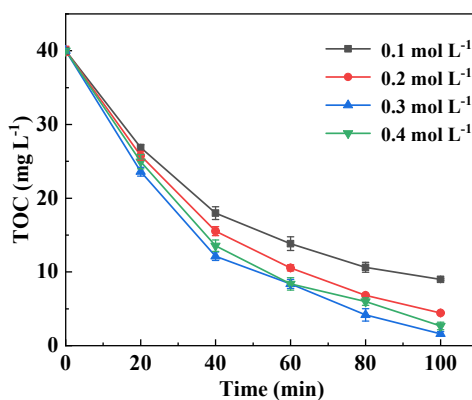

84

85 **Fig. S5** Effect of concentration of impregnation solution on TOC removal of phenol  
 86 (Conditions: calcination temperature  $400 \text{ }^\circ\text{C}$ , calcination time 4 h,  $[\text{O}_3] = 10.1 \text{ mg L}^{-1}$ , pH =  $7.2$ )

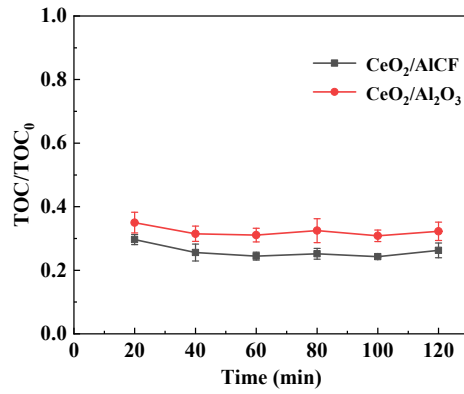

87

88 **Fig. S6** Effect of CeO<sub>2</sub>/AlCF and CeO<sub>2</sub>/Al<sub>2</sub>O<sub>3</sub> on TOC removal of phenol (Conditions:

89 Catalyst dosage=60 g L<sup>-1</sup>, [phenol]=40 mg L<sup>-1</sup>, initial pH=7, HRT=12 min, [O<sub>3</sub>]=20.2 mg L<sup>-1</sup>,

90

pore density=30 ppi)

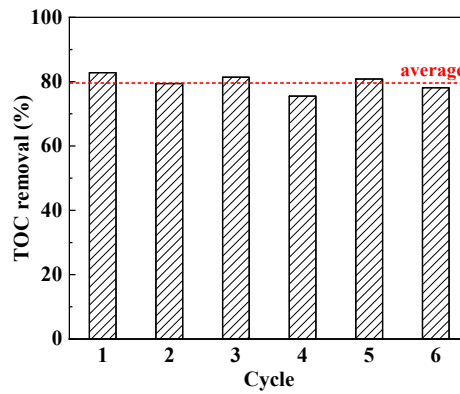

91

92 **Fig. S7** Stability of phenol degradation by CeO<sub>2</sub>/AlCF

93

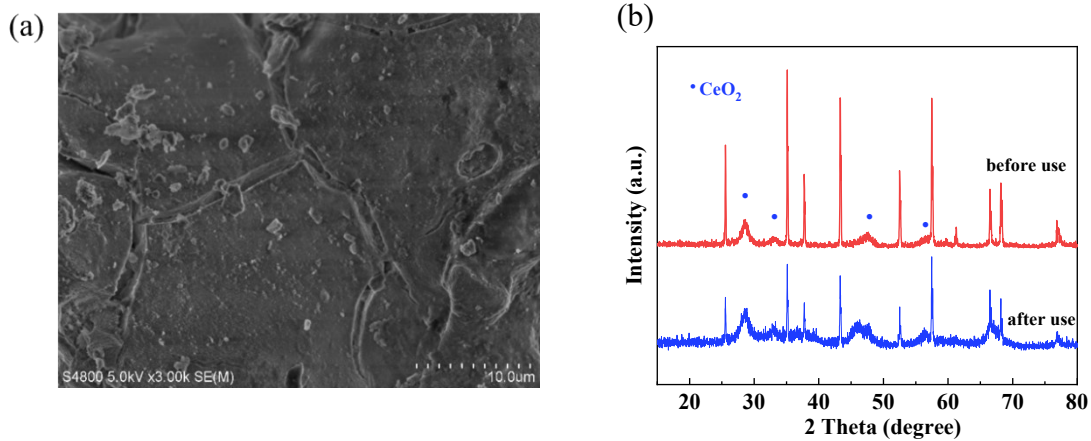

94

**Fig. S8** (a) SEM and (b) XRD of CeO<sub>2</sub>/AlCF after catalytic reaction

95

96

97 **Table S1** Specific surface area, pore volume and pore diameter of AlCF with different coating  
 98 content

| Catalysts | Specific surface area (m <sup>2</sup> g <sup>-1</sup> ) | Pore volume (cm <sup>3</sup> g <sup>-1</sup> ) | Pore diameter (nm) |
|-----------|---------------------------------------------------------|------------------------------------------------|--------------------|
| CF        | 0.684                                                   | 0.001                                          | 0.349              |
| 6%AlCF    | 17.7                                                    | 0.005                                          | 0.349              |
| 13%AlCF   | 24.8                                                    | 0.030                                          | 3.099              |
| 20% AlCF  | 68.2                                                    | 0.093                                          | 3.385              |
| 26% AlCF  | 97.2                                                    | 0.121                                          | 3.385              |

99

100 **Table S2** Water quality of effluent from the secondary sedimentation tank of a petrochemical  
 101 wastewater treatment plant for practical wastewater treatment

| Index                                  | value |
|----------------------------------------|-------|
| pH                                     | 8.6   |
| Chemical Oxygen Demand (COD) (mg/L)    | 136   |
| Total Organic Carbon (TOC) (mg/L)      | 51.1  |
| NH <sub>4</sub> <sup>+</sup> -N (mg/L) | 3.5   |
| Conductivity (μS/cm)                   | 3900  |

102
